# Supplementary material
Source: publisher site journal article supplement (https://journals.iucr.org/services/coeditors/meetings/jmb/2024/AppendixF_ActaE.pdf)
Supplement: Supplementary file 1 [file AppendixF_ActaE.pdf]

# 2022 Journal Performance Data for: ACTA CRYSTALLOGRAPHICA SECTION E- STRUCTURE REPORTS ONLINE

 Open Access since 2008

|                    |                                                    |
|--------------------|----------------------------------------------------|
| ISSN               | EISSN                                              |
| 2056-9890          | 2056-9890                                          |
| JCR ABBREVIATION   | ISO ABBREVIATION                                   |
| ACTA CRYSTALLOGR E | Acta Crystallogr. Sect. E-<br>Crystallogr. Commun. |

## Journal Information

|                                           |                        |                         |
|-------------------------------------------|------------------------|-------------------------|
| EDITION                                   | CATEGORY               |                         |
| Emerging Sources Citation<br>Index (ESCI) | CRYSTALLOGRAPHY - ESCI |                         |
| LANGUAGES                                 | REGION                 | 1ST ELECTRONIC JCR YEAR |
| English                                   | ENGLAND                | 2003                    |

## Publisher Information

|                              |                                         |                       |
|------------------------------|-----------------------------------------|-----------------------|
| PUBLISHER                    | ADDRESS                                 | PUBLICATION FREQUENCY |
| INT UNION<br>CRYSTALLOGRAPHY | 2 ABBEY SQ, CHESTER CH1<br>2HU, ENGLAND | 12 issues/year        |

# Journal's Performance

## Journal Impact Factor

The Journal Impact Factor (JIF) is a journal-level metric calculated from data indexed in the Web of Science Core Collection. It should be used with careful attention to the many factors that influence citation rates, such as the volume of publication and citations characteristics of the subject area and type of journal. The Journal Impact Factor can complement expert opinion and informed peer review. In the case of academic evaluation for tenure, it is inappropriate to use a journal-level metric as a proxy measure for individual researchers, institutions, or articles. [Learn more](#)

2022 JOURNAL IMPACT FACTOR

0.9

2022 JOURNAL IMPACT FACTOR WITHOUT SELF CITATIONS

0.6

## Journal Impact Factor Trend 2022

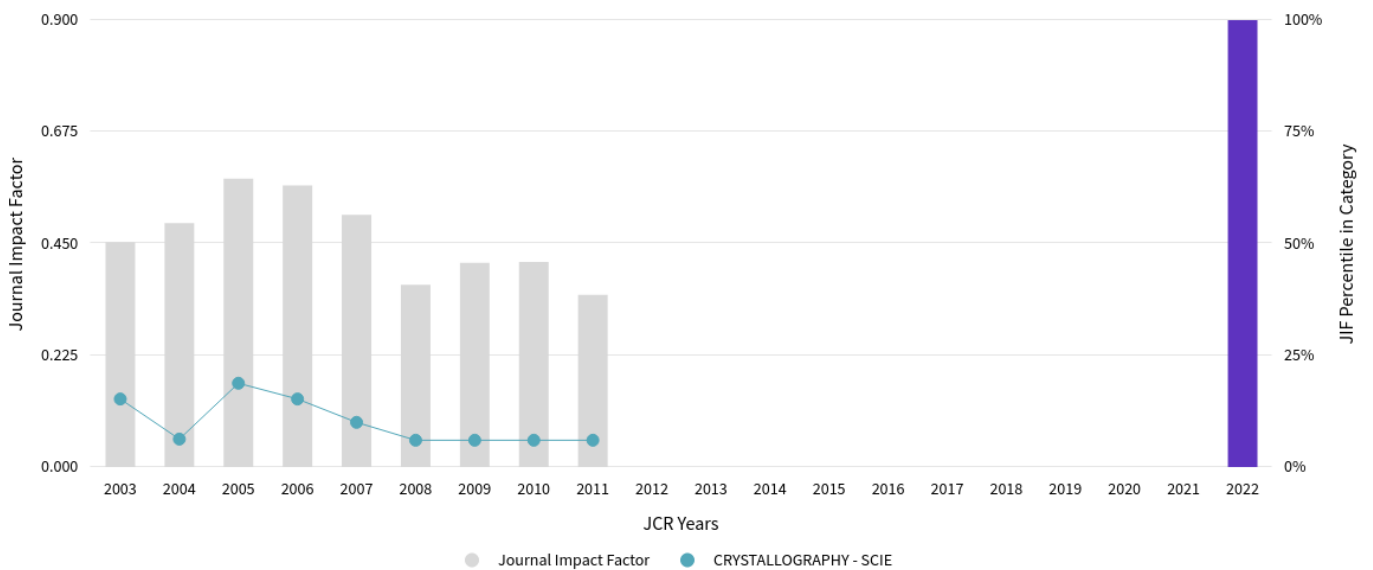

Journal Impact Factor is calculated using the following metrics

$$\frac{\text{Citations in 2022 to items published in 2020 (419) - 2021 (149)}}{\text{Number of citable items in 2020 (362) + 2021 (262)}} = \frac{568}{624} = 0.9$$

Journal Impact Factor without self cites is calculated using the following metrics

$$\frac{\text{Citations in 2022 to items published in 2020 (419) + 2021 (149) - Self Citations in 2022 to items published in 2020 (133) + 2021 (58)}}{\text{Number of citable items in 2020 (362) + 2021 (262)}} = \frac{568 - 191}{624} = 0.6$$

## Journal Impact Factor Contributing Items

### Citable Items (624)

| TITLE                                                                                                                                                                                                                                                                                                                | CITATION COUNT                                                                             |
|----------------------------------------------------------------------------------------------------------------------------------------------------------------------------------------------------------------------------------------------------------------------------------------------------------------------|--------------------------------------------------------------------------------------------|
| checkCIF validation ALERTS: what they mean and how to respond<br>Authors: Spek, Anthony L.<br>Volume: 76<br>Accession number: WOS:000505956900001<br>Document Type: Article                                                                                                                                          | 196<br> |
| Crystal structure, DFT and Hirshfeld surface analysis of (E)-N'-[(1-chloro-3,4-dihydronaphthalen-2-yl)methylidene]benzohydrazide monohydrate<br>Authors: Arjun, H. A.;Kumar, G. N. Anil;Elancheran, R.;Kabilan, S.<br>Volume: 76<br>Accession number: WOS:000512329700003<br>Document Type: Article                  | 13<br>  |
| Crystal structure of (R)-5-[(R)-3-(4-chlorophenyl)-5methyl-4,5-dihydroisoxazol-5-yl]-2-methylcyclohex-2-enone<br>Authors: Oubella, Ali;Itto, My Youssef Ait;Auhmani, Aziz;Riahi, Abdelkhalek;Daran, Jean-Claude;Auhmani, Abdelwahed<br>Volume: 76<br>Accession number: WOS:000518844900021<br>Document Type: Article | 8<br>   |
| Crystal structures of the recreational drug N-(4-methoxyphenyl)piperazine (MeOPP) and three of its salts<br>Authors: Kumar, Haruvegowda Kiran;Yathirajan, Hemmige S.;Chinthal, Chayanna Harish;Foro, Sabine;Glidewell, Christopher<br>Volume: 76<br>Accession number: WOS:000524115100006<br>Document Type: Article  | 7<br> |
| Synthesis, crystal structure, DFT calculations and Hirshfeld surface analysis of 3-butyl-2,6-bis(4-fluorophenyl)piperidin-4-one<br>Authors: Anitha, K.;Sivakumar, S.;Arulraj, R.;Rajkumar, K.;Kaur, Manpreet;Jasinski, Jerry P.<br>Volume: 76<br>Accession number: WOS:000533786100011<br>Document Type: Article     | 7<br> |

Showing 1-5 rows of 624 total (use export in the relevant section to download the full table)

## Journal Impact Factor Contributing Items

### Citing Sources (131)

| SOURCE NAME                                                                           | COUNT |
|---------------------------------------------------------------------------------------|-------|
| ACTA CRYSTALLOGRAPHICA SECTION E-CRYSTALLOGRAPHIC COMMUNICATIONS                      | 190   |
| JOURNAL OF MOLECULAR STRUCTURE                                                        | 49    |
| ACTA CRYSTALLOGRAPHICA SECTION C-STRUCTURAL CHEMISTRY                                 | 29    |
| ZEITSCHRIFT FUR KRISTALLOGRAPHIE-NEW CRYSTAL STRUCTURES                               | 17    |
| CRYSTENGGCOMM                                                                         | 12    |
| MOLECULES                                                                             | 10    |
| CRYSTALS                                                                              | 9     |
| ACS OMEGA                                                                             | 8     |
| ACTA CRYSTALLOGRAPHICA SECTION B-STRUCTURAL SCIENCE CRYSTAL ENGINEERING AND MATERIALS | 8     |
| DALTON TRANSACTIONS                                                                   | 8     |
| HELIYON                                                                               | 8     |
| MOLBANK                                                                               | 7     |
| RSC ADVANCES                                                                          | 7     |
| INORGANIC CHEMISTRY                                                                   | 5     |
| MOLECULAR CRYSTALS AND LIQUID CRYSTALS                                                | 5     |
| NEW JOURNAL OF CHEMISTRY                                                              | 5     |
| POLYHEDRON                                                                            | 5     |
| CRYSTAL GROWTH & DESIGN                                                               | 4     |
| EUROPEAN JOURNAL OF INORGANIC CHEMISTRY                                               | 4     |
| INORGANIC CHEMISTRY COMMUNICATIONS                                                    | 4     |

Showing 1-20 rows of 131 total (use export in the relevant section to download the full table)

# Journal Citation Indicator (JCI)

0.42

The Journal Citation Indicator (JCI) is the average Category Normalized Citation Impact (CNCI) of citable items (articles & reviews) published by a journal over a recent three year period. The average JCI in a category is 1. Journals with a JCI of 1.5 have 50% more citation impact than the average in that category. It may be used alongside other metrics to help you evaluate journals. [Learn more](#)

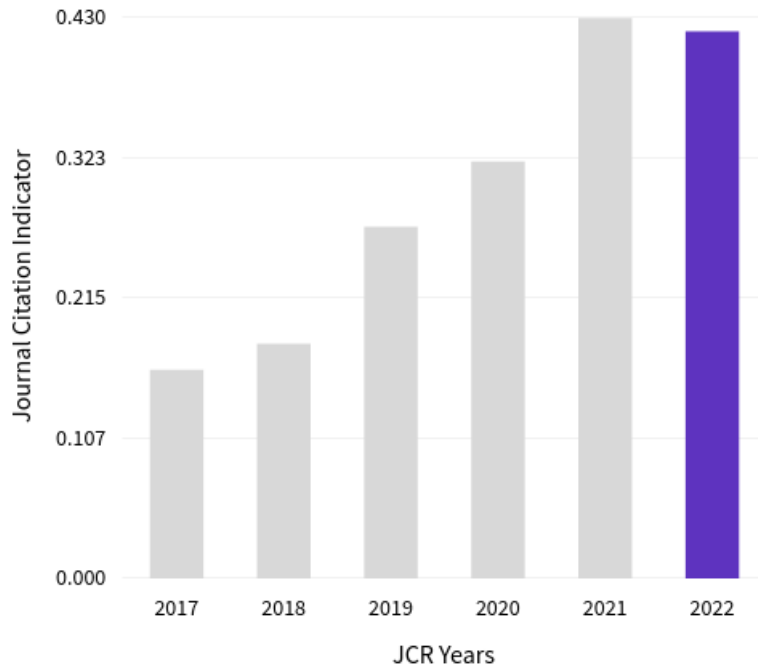

# Total Citations

4,877

The total number of times that a journal has been cited by all journals included in the database in the JCR year. Citations to journals listed in JCR are compiled annually from the JCR years combined database, regardless of which JCR edition lists the journal.

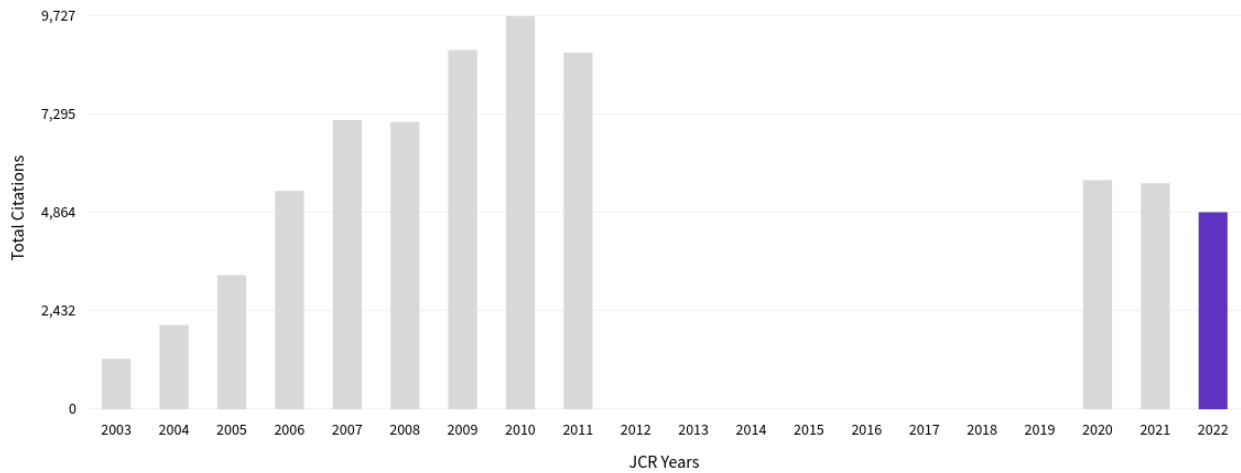

# Citation Distribution

The Citation Distribution shows the frequency with which items published in the year or two years prior were cited in the JCR data year (i.e., the component of the calculation of the JIF). The graph has similar functionality as the JIF Trend graph, including hover-over data descriptions for each data point, and an interactive legend where each data element's legend can be used as a toggle. You can view Articles, Reviews, or Non-Citable (other) items to the JIF numerator. [Learn more](#)

ARTICLE CITATION MEDIAN

0

REVIEW CITATION MEDIAN

N/A

UNLINKED CITATIONS

7

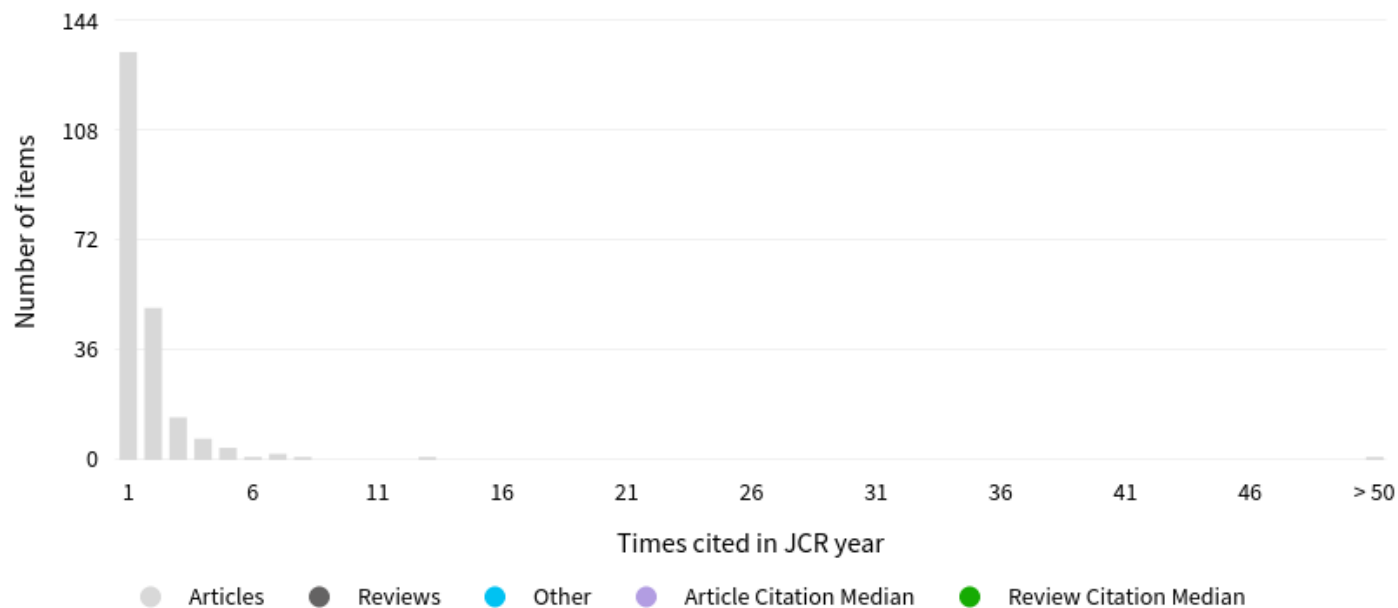

## 0 times cited

ARTICLES

409

REVIEWS

0

OTHER

5

# Open Access (OA)

The data included in this tile summarizes the items published in the journal in the JCR data year and in the previous two years. This three-year set of published items is used to provide descriptive analysis of the content and community of the journal. [Learn more](#)

## Items

TOTAL CITABLE % OF CITABLE OA

**876** **97.60%**

CITABLE

● GOLD OPEN ACCESS

855 / 96.28%

● SUBSCRIPTION OR BRONZE

21 / 2.36%

NON-CITABLE

● OTHER (NON-CITABLE ITEMS)

12 / 1.35%

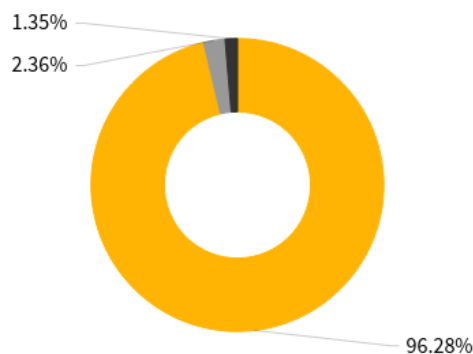

## Citations\*

TOTAL CITABLE % OF CITABLE OA

**651** **99.23%**

CITABLE

● GOLD OPEN ACCESS

646 / 97.29%

● SUBSCRIPTION OR BRONZE

5 / 0.75%

NON-CITABLE

● OTHER (NON-CITABLE ITEMS)

0 / 0.00%

● UNLINKED CITATIONS

13 / 1.96%

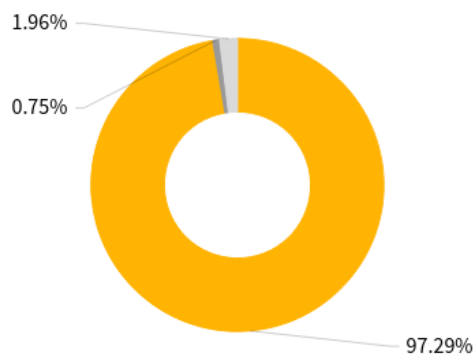

\* Citations in 2022 to items published in (2020-2022)

# Rank by Journal Impact factor

**Note:** While journals indexed in AHCI and ESCI are receiving a JIF for the first time in June 2023, they will not receive ranks, quartiles, or percentiles until the release of 2023 data in June 2024. [Learn more](#)

## EDITION

Science Citation Index Expanded (SCIE)

## CATEGORY

CRYSTALLOGRAPHY

**N/A**

| JCR YEAR | JIF RANK | QUARTILE | JIF PERCENTILE |                      |
|----------|----------|----------|----------------|----------------------|
| 2022     | N/A      | N/A      | N/A            | <input type="text"/> |
| 2021     | N/A      | N/A      | N/A            | <input type="text"/> |
| 2020     | N/A      | N/A      | N/A            | <input type="text"/> |
| 2019     | N/A      | N/A      | N/A            | <input type="text"/> |
| 2018     | N/A      | N/A      | N/A            | <input type="text"/> |
| 2017     | N/A      | N/A      | N/A            | <input type="text"/> |
| 2016     | N/A      | N/A      | N/A            | <input type="text"/> |
| 2015     | N/A      | N/A      | N/A            | <input type="text"/> |
| 2014     | N/A      | N/A      | N/A            | <input type="text"/> |
| 2013     | N/A      | N/A      | N/A            | <input type="text"/> |
| 2012     | N/A      | N/A      | N/A            | <input type="text"/> |
| 2011     | 24/25    | Q4       | 6.00           | <input type="text"/> |
| 2010     | 24/25    | Q4       | 6.00           | <input type="text"/> |
| 2009     | 24/25    | Q4       | 6.00           | <input type="text"/> |
| 2008     | 24/25    | Q4       | 6.00           | <input type="text"/> |
| 2007     | 23/25    | Q4       | 10.00          | <input type="text"/> |
| 2006     | 20/23    | Q4       | 15.22          | <input type="text"/> |
| 2005     | 20/24    | Q4       | 18.75          | <input type="text"/> |
| 2004     | 23/24    | Q4       | 6.25           | <input type="text"/> |
| 2003     | 20/23    | Q4       | 15.22          | <input type="text"/> |

## Rank by Journal Citation Indicator (JCI)

Journals within a category are sorted in descending order by Journal Citation Indicator (JCI) resulting in the Category Ranking below. A separate rank is shown for each category in which the journal is listed in JCR. Data for the most recent year is presented at the top of the list, with other years shown in reverse chronological order. [Learn more](#)

### CATEGORY

CRYSTALLOGRAPHY

**23/33**

| JCR YEAR | JCI RANK | QUARTILE | JCI PERCENTILE |  |
|----------|----------|----------|----------------|--|
| 2022     | 23/33    | Q3       | 31.82          |  |
| 2021     | 20/33    | Q3       | 40.91          |  |
| 2020     | 23/33    | Q3       | 31.82          |  |
| 2019     | 26/33    | Q4       | 22.73          |  |
| 2018     | 28/32    | Q4       | 14.06          |  |
| 2017     | 28/31    | Q4       | 11.29          |  |

# Citation network

## Cited Half-life

11.8 years

The Cited Half-Life is the median age of the items in this journal that were cited in the JCR year. Half of a journal's cited items were published more recently than the cited half-life.

TOTAL NUMBER OF CITES

4,877

NON-SELF CITATIONS

4,287

SELF CITATIONS

590

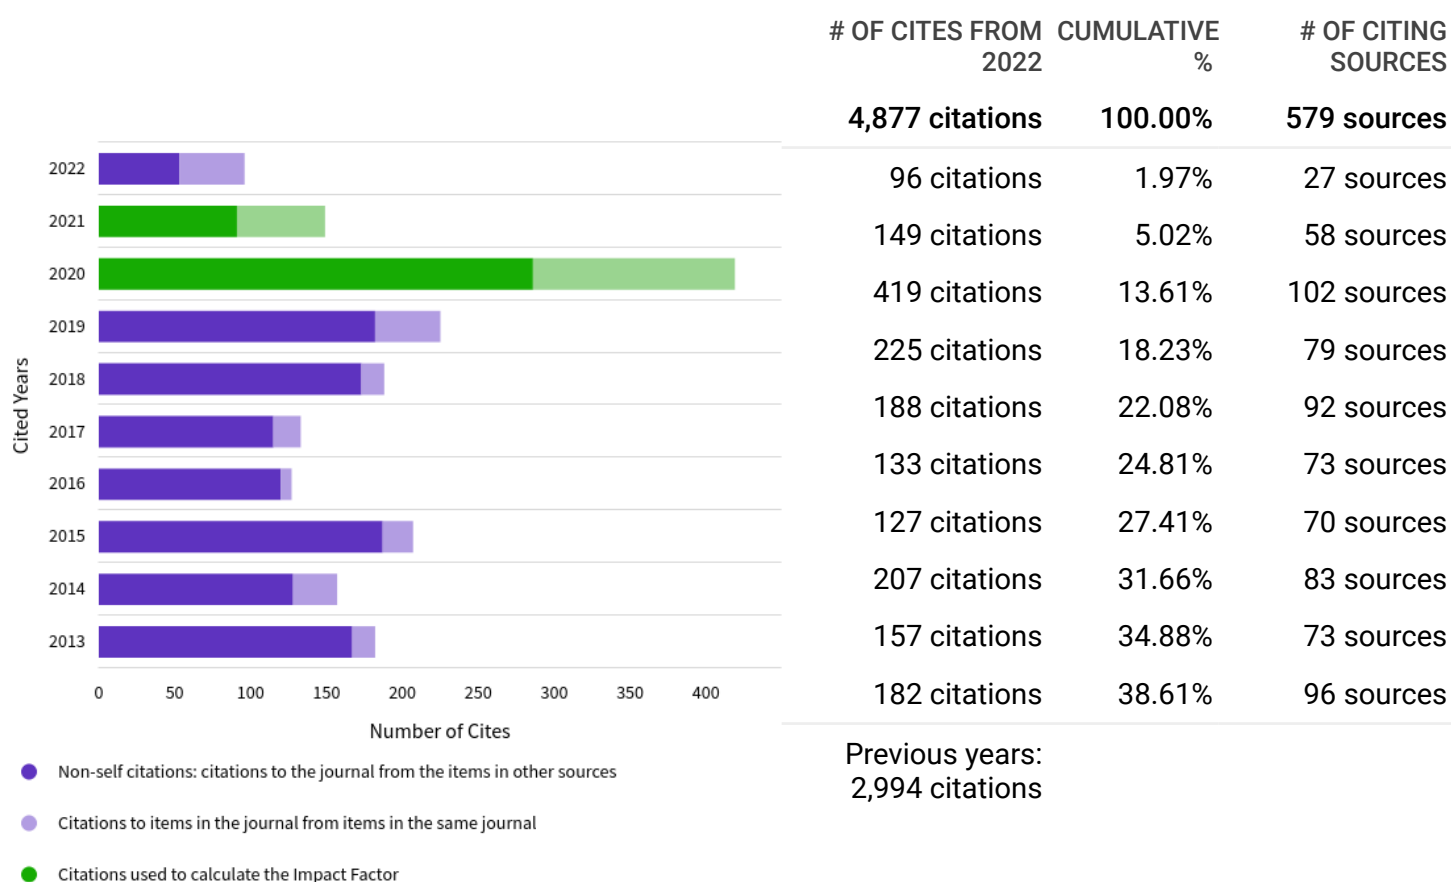

## Citing titles in all years

### ACTA CRYSTALLOGRAPHICA SECTION E-STRUCTURE REPORTS ONLINE

|    | SOURCE NAME                                               | COUNT |
|----|-----------------------------------------------------------|-------|
|    | All Others                                                | 262   |
| 1  | ACTA CRYSTALLOGRAPHICA SECTION E-STRUCTURE REPORTS ONLINE | 590   |
| 2  | Journal of Molecular Structure                            | 562   |
| 3  | ZEITSCHRIFT FUR KRISTALLOGRAPHIE-NEW CRYSTAL STRUCTURES   | 187   |
| 4  | MOLECULES                                                 | 147   |
| 5  | POLYHEDRON                                                | 129   |
| 6  | Crystals                                                  | 117   |
| 7  | CRYSTENGGCOMM                                             | 96    |
| 8  | DALTON TRANSACTIONS                                       | 87    |
| 9  | CRYSTAL GROWTH & DESIGN                                   | 79    |
| 10 | ACS Omega                                                 | 72    |
| 11 | INORGANIC CHEMISTRY                                       | 62    |
| 12 | ACTA CRYSTALLOGRAPHICA SECTION C-STRUCTURAL CHEMISTRY     | 58    |
| 13 | INORGANICA CHIMICA ACTA                                   | 56    |
| 14 | ChemistrySelect                                           | 53    |
| 15 | POLYCYCLIC AROMATIC COMPOUNDS                             | 52    |
| 16 | NEW JOURNAL OF CHEMISTRY                                  | 47    |
| 17 | JOURNAL OF SOLID STATE CHEMISTRY                          | 46    |
| 18 | JOURNAL OF MOLECULAR LIQUIDS                              | 44    |
| 19 | RSC Advances                                              | 44    |
| 20 | COORDINATION CHEMISTRY REVIEWS                            | 41    |

Showing 1 - 20 rows of 310 total (use export in the relevant section to download the full table)

# Citing Half-life

## 8.5 years

The Citing Half-Life is the median age of items in other publications cited by this journal in the JCR year.

TOTAL NUMBER OF CITES

7,057

NON-SELF CITATIONS

6,467

SELF CITATIONS

590

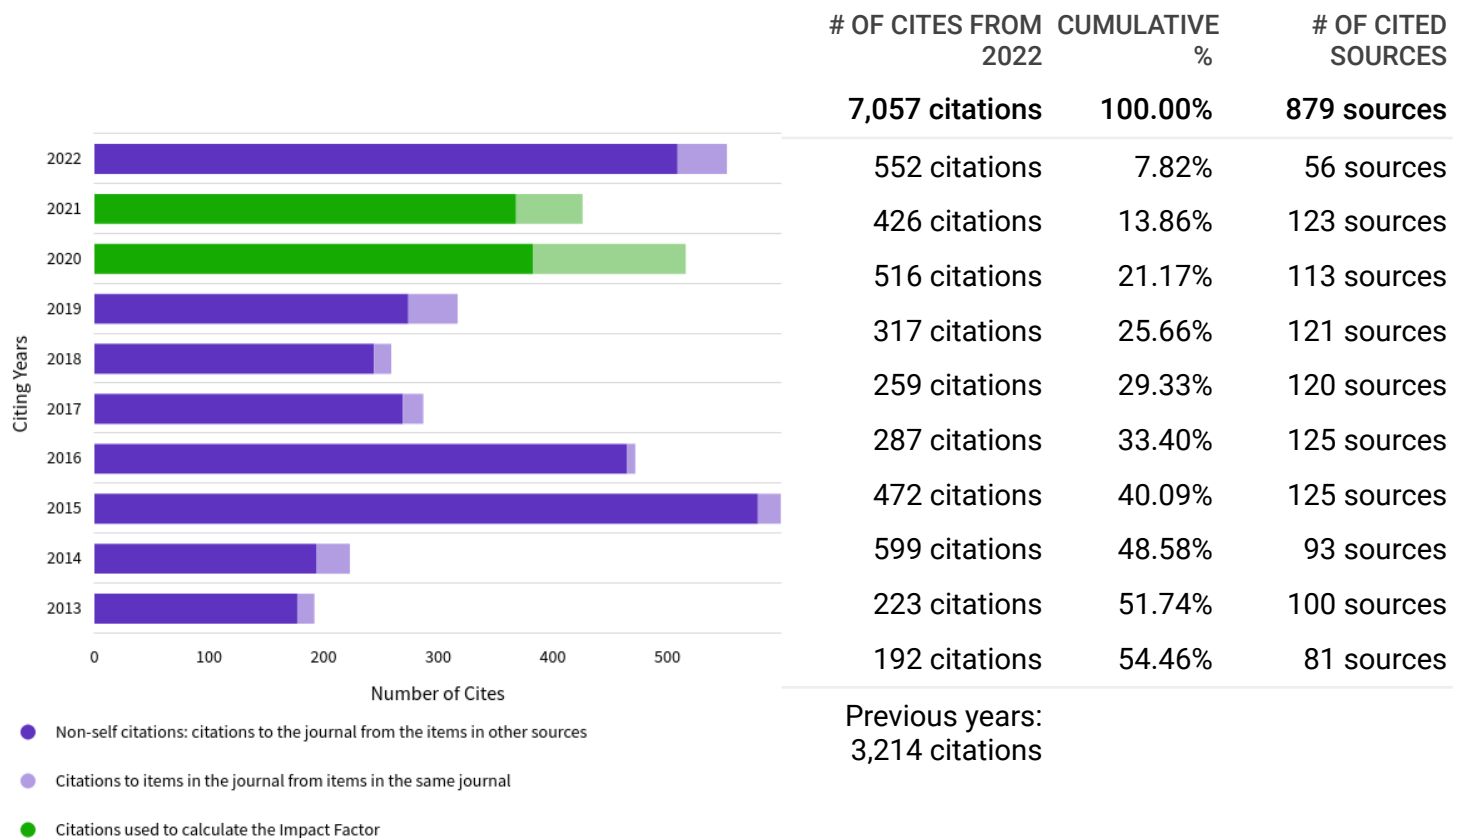

## Cited titles in all years

### ACTA CRYSTALLOGRAPHICA SECTION E-STRUCTURE REPORTS ONLINE

|    | SOURCE NAME                                                                           | COUNT |
|----|---------------------------------------------------------------------------------------|-------|
|    | All Others                                                                            | 495   |
| 1  | ACTA CRYSTALLOGRAPHICA SECTION E-STRUCTURE REPORTS ONLINE                             | 590   |
| 2  | JOURNAL OF APPLIED CRYSTALLOGRAPHY                                                    | 535   |
| 3  | Acta Crystallographica Section B-Structural Science Crystal Engineering and Materials | 387   |
| 4  | ACTA CRYSTALLOGRAPHICA SECTION C-STRUCTURAL CHEMISTRY                                 | 369   |
| 5  | Acta Crystallographica A-Foundation and Advances                                      | 205   |
| 6  | INORGANIC CHEMISTRY                                                                   | 166   |
| 7  | Journal of the American Chemical Society                                              | 153   |
| 8  | DALTON TRANSACTIONS                                                                   | 148   |
| 9  | CRYSTENGGCOMM                                                                         | 146   |
| 10 | Journal of Molecular Structure                                                        | 108   |
| 11 | CHEMICAL COMMUNICATIONS                                                               | 99    |
| 12 | ANGEWANDTE CHEMIE-INTERNATIONAL EDITION                                               | 85    |
| 13 | CHEMISTRY-A EUROPEAN JOURNAL                                                          | 81    |
| 14 | COORDINATION CHEMISTRY REVIEWS                                                        | 80    |
| 15 | POLYHEDRON                                                                            | 80    |
| 16 | ORGANOMETALLICS                                                                       | 71    |
| 17 | EUROPEAN JOURNAL OF MEDICINAL CHEMISTRY                                               | 65    |
| 18 | INORGANICA CHIMICA ACTA                                                               | 65    |
| 19 | CHEMICAL REVIEWS                                                                      | 62    |
| 20 | CRYSTAL GROWTH & DESIGN                                                               | 61    |

Showing 1 - 20 rows of 261 total (use export in the relevant section to download the full table)

# Journal Citation Relationships

## Cited Data

Top 20 journals citing ACTA CRYSTALLOGR E by number of citations

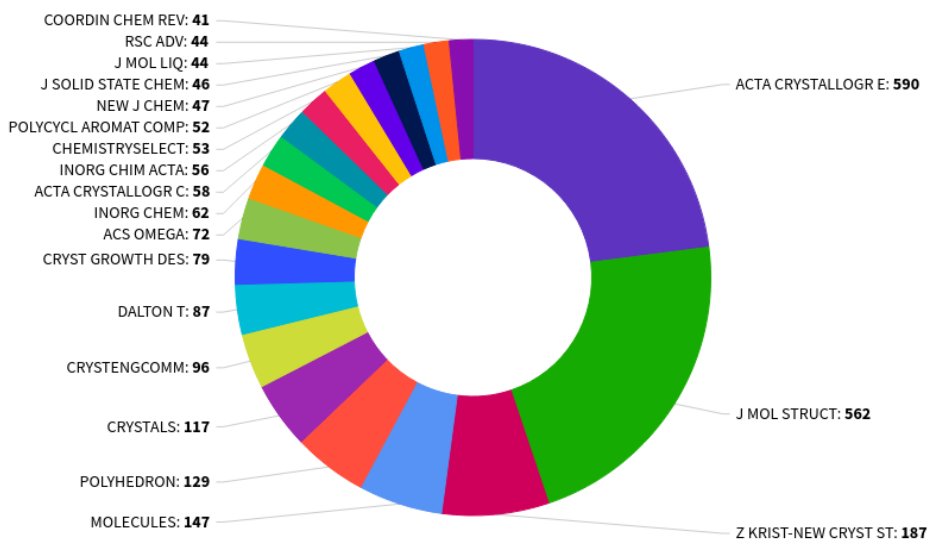

# Citing Data

## Top 20 journals cited by ACTA CRYSTALLOGR E by number of citations

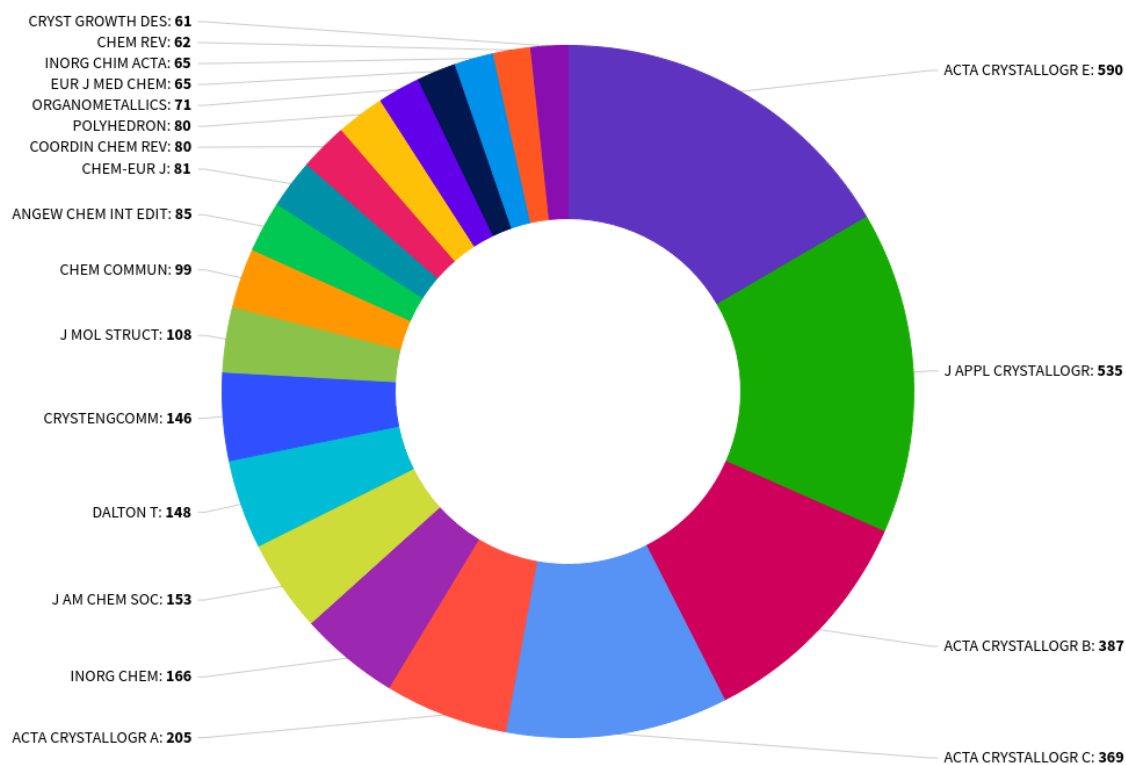

# Content metrics

## Source data

This tile shows the breakdown of document types published by the journal. Citable Items are Articles and Reviews. For the purposes of calculating JIF, a JCR year considers the publications of that journal in the two prior years. [Learn more](#)

### 252 total citable items

|                             | ARTICLES | REVIEWS | COMBINED (C) | OTHER DOCUMENT TYPES (O) | PERCENTAGE |
|-----------------------------|----------|---------|--------------|--------------------------|------------|
| NUMBER IN JCR YEAR 2022 (A) | 252      | 0       | 252          | 7                        | 97%        |
| NUMBER OF REFERENCES (B)    | 7,017    | 0       | 7,017        | 40                       | 99%        |
| RATIO (B/A)                 | 27.8     | N/A     | 27.8         | 5.7                      |            |

# Contributions by Organizations

Organizations that have contributed the most papers to the journal in the most recent three-year period. [Learn more](#)

| RANK | ORGANIZATION                                 | COUNT |  |
|------|----------------------------------------------|-------|--|
| 1    | ERCIYES UNIVERSITY                           | 73    |  |
| 2    | MINISTRY OF EDUCATION & SCIENCE OF UKRAINE   | 62    |  |
| 3    | RUSSIAN ACADEMY OF SCIENCES                  | 45    |  |
| 4    | MINISTRY OF EDUCATION OF AZERBAIJAN REPUBLIC | 44    |  |
| 5    | MOHAMMED V UNIVERSITY IN RABAT               | 42    |  |
| -    | TULANE UNIVERSITY                            | 42    |  |
| 7    | NATIONAL ACADEMY OF SCIENCES UKRAINE         | 38    |  |
| 8    | PEOPLES FRIENDSHIP UNIVERSITY OF RUSSIA      | 35    |  |

Showing 1 - 8 rows of 656 total (use export in the relevant section to download the full table)

# Contributions by country/region

Countries or Regions that have contributed the most papers to the journal in the most recent three-year period. [Learn more](#)

| RANK | COUNTRY/REGION        | COUNT |  |
|------|-----------------------|-------|--|
| 1    | USA                   | 229   |  |
| 2    | Turkey                | 136   |  |
| 3    | GERMANY (FED REP GER) | 121   |  |
| 4    | India                 | 103   |  |
| 5    | Ukraine               | 80    |  |
| 6    | Yemen                 | 54    |  |
| 7    | Morocco               | 53    |  |
| 8    | Russia                | 51    |  |

Showing 1 - 8 rows of 81 total (use export in the relevant section to download the full table)

# Additional metrics

## Eigenfactor score

**0.00120**

The Eigenfactor Score is a reflection of the density of the network of citations around the journal using 5 years of cited content as cited by the Current Year. It considers both the number of citations and the source of those citations, so that highly cited sources will influence the network more than less cited sources. The Eigenfactor calculation does not include journal self-citations. [Learn more](#)

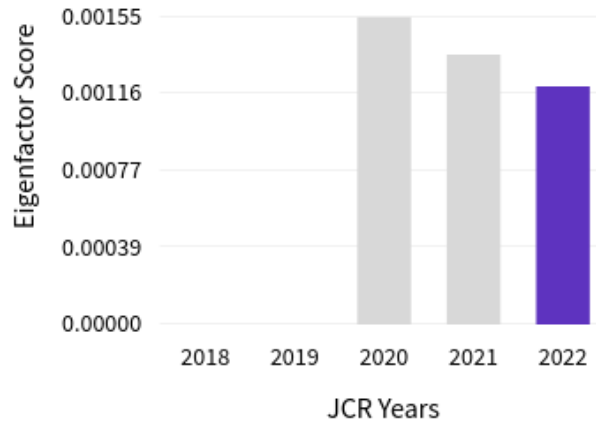

## Normalized Eigenfactor

**0.26213**

The Normalized Eigenfactor Score is the Eigenfactor score normalized, by rescaling the total number of journals in the JCR each year, so that the average journal has a score of 1. Journals can then be compared and influence measured by their score relative to 1. [Learn more](#)

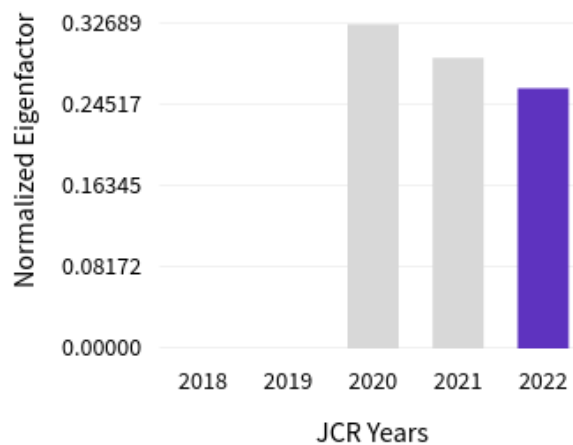

## Article influence score

**0.073**

The Article Influence Score normalizes the Eigenfactor Score according to the cumulative size of the cited journal across the prior five years. The mean Article Influence Score for each article is 1.00. A score greater than 1.00 indicates that each article in the journal has above-average influence. [Learn more](#)

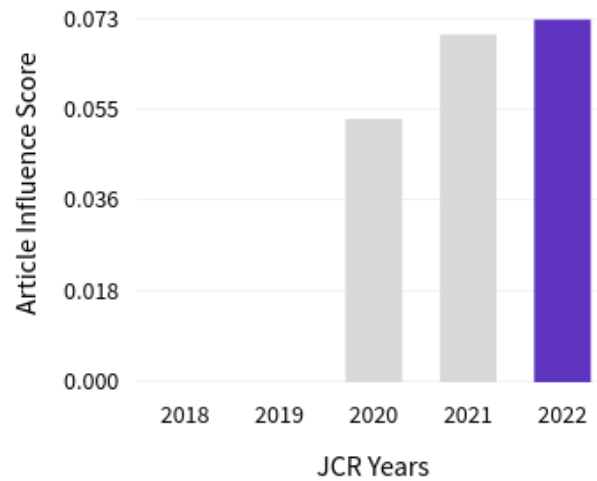

## 5 year Impact Factor

0.6

The 5-year Impact Factor is the average number of times articles from the journal published in the past five years have been cited in the JCR year. It is calculated by dividing the number of citations in the JCR year by the total number of articles published in the five previous years.

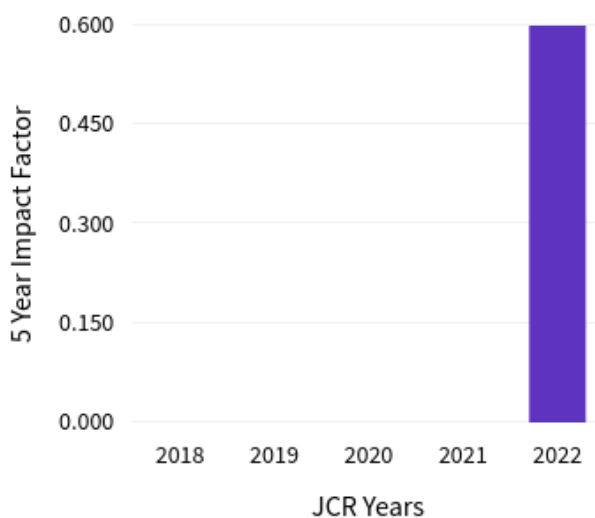

5 year Impact Factor calculation

|                                                                |   |                       |   |     |
|----------------------------------------------------------------|---|-----------------------|---|-----|
| Citations in 2022 to items published in [2017-2021]<br>(1,114) | = | $\frac{1,114}{1,878}$ | = | 0.6 |
| Number of citable items in [2017-2021] (1,878)                 |   |                       |   |     |

# Immediacy Index

0.4

The Immediacy Index is the count of citations in the current year to the journal that reference content in this same year. Journals that have a consistently high Immediacy Index attract citations rapidly.

[Learn more](#)

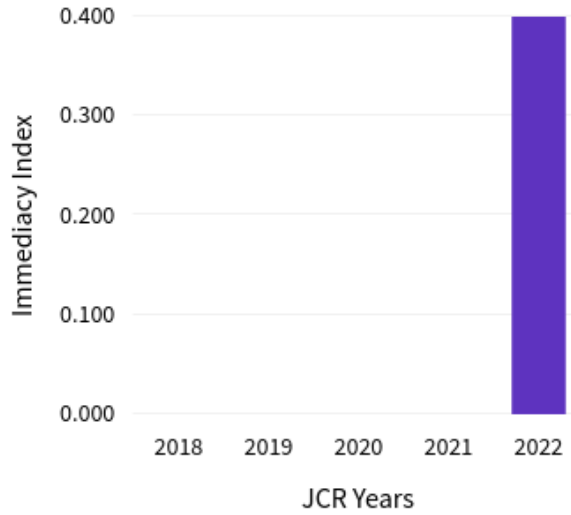

Immediacy Index calculation

|                                          |     |                |
|------------------------------------------|-----|----------------|
| Cites in 2022 to items published in 2022 | 96  |                |
| <hr/>                                    |     | 96 / 252 = 0.4 |
| Number of items published in 2022        | 252 |                |
